# Supplementary material for: The m6A Methyltransferase METTL3-Mediated N6-Methyladenosine Modification of DEK mRNA to Promote Gastric Cancer Cell Growth and Metastasis
Source: MDPI journal article supplement (doi:10.3390/ijms23126451), 2022-06-09
Supplement: s1 [file s1]

**Table S1.** Relationship between METTL3 expression and clinicopathological characteristics in 20 GC tissues.

| Clinicopathologic parameters | n  | METTL3 expression |      | <i>p</i> |
|------------------------------|----|-------------------|------|----------|
|                              |    | low               | high |          |
| All cases                    | 20 | 10                | 10   |          |
| Age                          |    |                   |      | 0.738    |
| < 60                         | 6  | 3                 | 3    |          |
| ≥60                          | 14 | 7                 | 7    |          |
| Gender                       |    |                   |      | 0.921    |
| male                         | 11 | 6                 | 5    |          |
| female                       | 9  | 4                 | 5    |          |
| TNM stage                    |    |                   |      | 0.037    |
| I/II                         | 9  | 7                 | 2    |          |
| III/IV                       | 11 | 3                 | 8    |          |
| Distant metastasis           |    |                   |      | 0.028    |
| No                           | 11 | 7                 | 4    |          |
| Yes                          | 9  | 3                 | 6    |          |
| Lymph nodes metastasis       |    |                   |      | 0.019    |
| No                           | 10 | 7                 | 3    |          |
| Yes                          | 10 | 3                 | 7    |          |

**Table S2.** Primer information required for qPCR process.

| Primer name         | Primer sequence (5'–3') |
|---------------------|-------------------------|
| qPCR-DEK-Forward    | AACTGCTTTACAAACAGGCCAG  |
| qPCR-DEK-Reverse    | ATGGTTTGCCAGAAGGCTTTG   |
| qPCR-METTL3-Forward | TTGTCTCCAACCTTCCGTAGT   |
| qPCR-METTL3-Reverse | CCAGATCAGAGAGGTGGTGTAG  |
| qPCR-Actin-Forward  | CATGTACGTTGCTATCCAGGC   |
| qPCR-Actin -Reverse | CTCCTTAATGTCACGCACGAT   |
| DEK-site1-F         | ATTGCACAAGGAAAGGGGCAGA  |
| DEK-site1-R         | GCCACTGAACTGACCCACATTCT |
| DEK-site2-F         | ACCATTATACCAGCAAAGAGAAT |

|               |                          |
|---------------|--------------------------|
| DEK-site2-R   | ATGCAATTTAAAACAGCAAACCTC |
| DEK-site3-4-F | AACAGTTACCCTGCTTTGCCTC   |
| DEK-site3-4-R | GTGCTTGTACTTAATCCCACCCT  |
| DEK-site5-F   | AACAGGTATTTTCACAGGTTTGT  |
| DEK-site5-R   | ATCGAAGGCCAATTATTAGGTCT  |

**Table S3.** Primer information required for qPCR process.

| <b>Primer name</b> | <b>Primer sequence (5'–3')</b> |
|--------------------|--------------------------------|
| DEK-F              | ATGTCCGCCTCGGCC                |
| DEK-R              | TCAAGAAATTAGCTCTTTTACAGTT      |
| METTL3-F           | ATGTCGGACACGTGGAGC             |
| METTL3-R           | ATTCTTAGGTTTAGAGATGATACCATCTG  |

**Table S4.** Base sequence of shRNA.

| <b>shRNA name</b> | <b>targeting sequence</b> |
|-------------------|---------------------------|
| shDEK             | GGATAGTTCAGATGATGAA       |
| ShMETTL3          | GCCAAGGAACAATCCATTGTT     |
